1           **Whole transcriptome sequencing and biomineralization gene**  
2           **architecture associated with cultured pearl quality traits in the pearl**  
3                           **oyster, *Pinctada margaritifera***

4    Le Luyer J.<sup>1\*</sup>, Auffret P.<sup>1</sup>, Quillien V.<sup>1</sup>, Leclerc N.<sup>1</sup>, Reisser C.<sup>1</sup>, Vidal-Dupiol J.<sup>2,1</sup>, Ky C.-  
5    L.<sup>1,2\*</sup>

6

7    <sup>1</sup>        IFREMER, UMR 241 Ecosystèmes Insulaires Océaniques, Centre Ifremer du  
8    Pacifique, BP 49, 98719 Tahiti, Polynésie française

9    <sup>2</sup>        IFREMER, IHPE UMR 5244, Univ. Perpignan Via Domitia, CNRS, Univ. Montpellier,  
10   F-34095 Montpellier, France  
11

12   **\*Corresponding authors:** jeremy.le.luyer@ifremer.fr; chinky@ifremer.fr

13

14   **Keywords:** *Pinctada margaritifera* – biomineralization– pearl quality – pearl sac – RNA-  
15   seq

16

## 17 **Abstract**

### 18 Background

19 Cultured pearls are unique gems produced by living organisms, mainly molluscs of the  
20 *Pinctada* genus, through the biomineralization properties of pearl sac tissue.  
21 Improvement of *P. margaritifera* pearl quality is one of the biggest challenges that  
22 Polynesian research has faced to date. To achieve this goal, a better understanding of the  
23 complex mechanisms related to nacre and pearl formation is essential and can now be  
24 approached through the use of massive parallel sequencing technologies. The aim of this  
25 study was to use RNA-seq to compare whole transcriptome expression of pearl sacs that  
26 had producing pearls with high and low quality. For this purpose, a comprehensive  
27 reference transcriptome of *P. margaritifera* was built based on multi-tissue sampling  
28 (mantle, gonad, whole animal), including different living stages (juvenile, adults) and  
29 phenotypes (colour morphotypes, sex).

### 30 Results

31 Strikingly, few genes were found to be up-regulated for high quality pearls (n = 16)  
32 compared to the up-regulated genes in low quality pearls (n = 246). Biomineralization  
33 genes up-regulated in low quality pearls were specific to prismatic and prism-nacre  
34 layers. Alternative splicing was further identified in several key biomineralization genes  
35 based on a recent *P. margaritifera* draft genome.

### 36 Conclusion

37 This study lifts the veil on the multi-level regulation of biomineralization genes  
38 associated with pearl quality determination.

## 39 Background

40 The mollusc *Pinctada margaritifera* var. *Cumingii* is a species of great economic importance  
41 in French Polynesia. The associated pearl industry represents the second most important  
42 source of income there, just after tourism. Cultured pearl production requires two distinct  
43 animals. A small piece of graft mantle tissue is dissected from a sacrificed donor oyster and  
44 inserted with a round bead of nacre (a nucleus, made of mussel shell) into the gonad of a  
45 recipient oyster [1, 2]. If the graft is not rejected and the recipient oyster survives the grafting  
46 operation, the implanted mantle tissue will grow to completely surround the nucleus and form  
47 a "pearl sac", capable of secreting biomaterial layers (calcite and aragonite) around the  
48 nucleus [3]. After 15 to 24 months of culture, pearls are harvested and usually sorted  
49 according to six main quality traits: size, shape, colour, surface complexion, lustre and grade  
50 [4]. It is estimated, however, that only 5% of the harvested pearls can be classified as grade A,  
51 which corresponds to the best quality according to the local regulatory quality standards [5].  
52 Average export price of cultured pearls in French Polynesia has fallen dramatically over the  
53 past decade, mainly due to a combination of factors including overproduction; hence quantity  
54 has been favoured to the detriment of quality. The improvement of cultured pearl quality is an  
55 imperative aspect of a pearl farm's sustainability and as one of the biggest challenges that  
56 research is facing in French Polynesia.

57 Factors affecting pearl quality have diverse and non-exclusive origins including  
58 genetics, environment and/or genotype-by-environment interaction (GEI). This is  
59 further complexified in the *Pinctada* transplant model because of the phenotype  
60 transmission from the donor oyster to the recipient oyster, their interplay, and their  
61 interaction with the environment. One particularity of this animal model is the chimera system  
62 attributed to the pearl sac tissue, whose interaction between  $\text{Genome}_{\text{Donor}} \times \text{Genome}_{\text{Host}}$  has  
63 a significant effect on pearl quality. A recent study in *P. margaritifera*, based on

64 controlled bi-parental crosses and the F1 generation, demonstrated heritability ( $h^2$  from  
65 0.21 to 0.37) for nacre weight and thickness, pigmentation darkness and colour, surface  
66 defects and grade, signifying a donor oyster effect with a genetic basis, although there  
67 were also important interaction components [6]. Previous studies reported that  
68 location, temperature and food availability [7–9], pearl rotation [10], donor oyster  
69 genotype [4, 11–14], age [15], position of graft mantle [16] and contamination during  
70 the graft operation and/or graft operator skills [17] are all determinants of final pearl  
71 quality and do not necessarily affect similar traits.

72 Various genomic approaches have been applied in pearl oyster with the  
73 objectives of identifying key candidate markers related to pearl quality traits. For  
74 instance, Lemer et al. [18] identified a set of genes differentially expressed between two  
75 mantle colour phenotypes (black *P. margaritifera* phenotypes and full albino individuals),  
76 using a suppressive and subtractive hybridization (SSH) method. In silver-lipped oyster  
77 (*Pinctada maxima*), genetic association analyses has permitted the identification of QTLs  
78 linked to pearl surface complexion and colour as well as genetic associations of regions  
79 and markers for pearl size, weight, colour and surface complexion [19, 20].  
80 Transcriptome-wide and proteomic approaches have also been used to characterize the  
81 pool of genes expressed during pearl formation and to discriminate markers  
82 preferentially associated with nacreous and/or prismatic layers. Studies in the Japanese  
83 pearl oyster (*Pinctada fucata*) showed that the genes *msi60* and *aspein* from the mantle  
84 tissue were up-regulated in low quality pearls compared to high quality groups, while  
85 the expression of the *msi30* gene from the pearl sac tissue was up-regulated in high  
86 quality pearls [21, 22]. Finally, a recent study on *P. margaritifera* revealed that  
87 *shematin5* and *9*, *prismalin* and *aspein* encoding genes were up-regulated in the pearl  
88 sacs of individuals producing low pearl surface quality [23]. Studies have been limited to

89 relatively few candidate genes, however, and an overall evaluation of the actors involved  
90 in pearl quality remains to be conducted.

91 The aim of our present study was to identify key genes involved in the regulation  
92 of pearl quality through a comparative RNA-seq analysis of pearl sacs producing high  
93 and low quality cultured pearls. We constructed a new comprehensive multi-tissue  
94 transcriptome assembly, covering several developmental stages, colour morphotypes  
95 and tissue origins, which will be useful for further transcriptomic studies in *P.*  
96 *margaritifera*. Furthermore, based on a recently assembled draft genome of *P.*  
97 *margaritifera*, we successfully explored the possibility that alternative gene splicing  
98 events are involved in the regulation of biomineralization processes.

## 99 **Results**

100 **Transcriptome assembly.** The raw transcriptome assembly contained 541,184  
101 transcripts. After filtering for redundancy and functionality, we retained a total of  
102 41,075 transcripts (assembly metrics given in Table 2). Transcriptome completeness  
103 evaluation indicated that 90.6 % of the highly conserved single-copy metazoan genes (n  
104 = 978) were present in our transcriptome (89.8 % are complete and in a single-copy).  
105 Similarly, mean mapping rate reached  $66.31 \pm 1.72$  % with negligible differences in  
106 sample condition. Both the transcriptome completeness and satisfactory mapping rate  
107 suggest that the several steps of filtering applied did not have major impact on the  
108 overall transcriptome. Functional annotation identified a total of 33,532 transcripts  
109 (81.5%) with at least one match with deposited sequences (Table 2).

110 **Differential expression in biomineralization-related genes.** We found a total of 262  
111 differentially expressed genes (DEGs), with 246 up- and 16 down-regulated genes in low  
112 quality pearls (Table S3). Out of the 262 DEGs, 216 (82.24%) had at least one match with

113 known protein sequences (Table S3). Finally, only 114 of the DEGs (43.5 %) had at least  
114 one associated GO term. GO analysis revealed enrichment for some relevant functions  
115 involved in pearl formation, including oxidoreductase activity (GO:0016491), peptidase  
116 inhibitor activity (GO:0030414), serine-type peptidase activity (GO:0008236), chitin  
117 binding (GO:0008061) and copper ion binding (GO:0005507). The GO enrichment  
118 analysis is summarized in Figure S1.

119 We identified several biomineralization genes discriminating high and low  
120 quality pearls (Figure 3; Table S3). Most of these genes are characteristic of prismatic  
121 and prism-nacre layers [24] and were found up-regulated in low quality pearls. The blue  
122 mussel shell protein-like (*BMSP-like*) coding gene is the single biomineralization gene  
123 up-regulated in high quality pearls. *BMSP-like* shares strong homology with the *P. fucata*  
124 *pif-177* gene and is notably involved in determining the polymorph of CaCO<sub>3</sub> [25]. We  
125 also identified Gypsy and Jockey-family transposable elements up-regulated in high  
126 quality pearls (Table S3). The qPCR analysis shows that the individual relative  
127 expression of the four biomineralization-related genes analysed is in accordance with  
128 results from pool RNA-seq data (Figure S2). We found the *MP10*, *shematin-9* and *aspein*  
129 up-regulated in low quality pearls (p-value < 0.001) while no significant difference was  
130 observed for *pif-177* (p-value = 0.012).

131 **Different alternative splicing in biomineralization-related genes.** We found a total  
132 of 28 transcripts showing significant differential splicing (FDR < 0.001) (Figure 4).  
133 Several of these genes are known to be involved in biomineralization processes: *pif*,  
134 *aspein*, *pwap* and *wdf18*. For *aspein*, high quality pearls show lower exon 1 usage. This  
135 specific exon overlaps with the promoter domain of the transcript while the exon 2  
136 codes for the D-domain rich in Asp amino acid that gives the *aspein* protein its crystal

137 binding affinity and its function in regulating crystal growth [21, 26–29]. The GO  
138 enrichment analysis identified the peptide biosynthetic process (GO:0043043), amide  
139 biosynthetic process (GO:0043604) and translation function (GO:0006412) as enriched  
140 for the genes showing different exon usage.

## 141 **Discussion**

142 Access to massive parallel sequencing technologies now greatly contributes to the  
143 understanding of molecular expression of the phenotype in non-model species. Here, we  
144 used a common transcriptomic approach (RNA-seq) to obtain an overview of differences  
145 in gene expression and alternative splicing between high and low cultured pearl quality.  
146 Recently, RNA-seq has been successfully used to explore genes related to pearl oyster  
147 growth and response to environmental stressors (*P. fucata*) [30, 31] and  
148 biomineralization (*P. martensii* and *P. penguin*) [32–34]. The use of RNA-seq in *P.*  
149 *margaritifera* for biomineralization related studies has been held back by the relatively  
150 limited coverage of previous transcriptome references (Roche 454; [35]) or their  
151 reduced tissue representation [36]. Recent work has however completed multi-tissue  
152 transcriptome assemblies of four species of pearl oysters including *P. margaritifera*. Yet,  
153 unfortunately, sampling did not include pearl sac tissues and to our knowledge  
154 assemblies were not made publicly available [37]. The present study provides a  
155 comprehensive reference transcriptome for *P. margaritifera*, encompassing whole-body  
156 tissue as well as phenotypic variation for a single common tissue (for gonads this was  
157 either female or male; for mantle tissue and whole individuals this covered a broad  
158 range of shell colour) as well as including individuals of different life stages (juveniles or  
159 adults). Even when applying stringent filtering, the satisfactory completeness as well as  
160 good individuals mapping rates and high gene content conservation with the closely

161 related species *P. fucata* (78% overlap) all suggested that this new reference  
162 transcriptome should prove itself a useful genomic resource for a broad range of future  
163 transcriptomic research for *P. margaritifera*.

164 **Complex responses of biomineralization genes are associated with pearl quality.**

165 The pearl sacs producing low quality pearls were characterized by a higher activity of  
166 prismatic layer-specific genes. Among the differentially expressed genes, *aspein* and  
167 *shematrixin-9* were found to be up-regulated in low quality pearl RNA-seq pools, as well as  
168 being validated by individual qPCR, which is consistent with previous candidate gene  
169 expression work [23]. The present study also provides a novel set of biomarkers  
170 involved in the biomineralization process, such as *perlwapin* and *BMSP-like* genes, and  
171 supports previous findings showing deep conservation of biomineralization genes  
172 within molluscs [38–40].

173 A considerable number of studies have focused on the identification of genes  
174 involved in aragonite and/or calcite formation in pearl oyster species and other bivalves  
175 capable of shell mineralisation [16,18,45–51]. Nonetheless, it has proven difficult to  
176 extrapolate the role of key actors involved in determining cultured pearl quality across  
177 studies. It is reasonable to hypothesize that contrasting results in the expression of  
178 biomineralization genes might result from the pleiotropic effect of biomineralization  
179 genes and/or major differences in the design of these different studies (genetic  
180 background, geographical locations, pearl grades sampled, time of sampling post-graft,  
181 environmental factors and tissue-analysed). For instance, differences in response of the  
182 *pearlin* gene, a gene commonly used to monitor biomineralization, have been observed  
183 in both graft and pearl sac tissues under similar environmental stress conditions  
184 (temperature and food availability) [8, 47]. Similarly, expression of key



185 biomineralization genes such as *nacrein* or *pif* in pearl sacs was clearly dependent on the  
186 time of sampling post-graft [8, 23]. *Pif*-related genes are particularly interesting because  
187 they directly controlled crystal growth during an *in vitro* experiment [41], yet the clear  
188 connexion between *pif*-related gene expression and pearl phenotypes remains unclear.  
189 The present study showed that neither *pif* nor *pif-177* were differentially expressed  
190 between high and low pearl quality despite these genes having already been correlated  
191 with pearl weight ( $Rho = 0.259$ ;  $p$ -value = 0.01) and pearl quality 3 months post-graft in  
192 previous studies on *P. margaritifera* [23, 48]. Inversely, the *BMSP-like* gene, a gene  
193 related to the *pif* family [49], was up-regulated in high quality pearls. Clearly, further  
194 studies will be needed to unravel the complex role of *pif*-related genes during the  
195 different stages of pearl formation. Nevertheless, this study supports previous findings  
196 on the role of *aspein* and *shematin 9* genes in controlling pearl quality, independently of  
197 geographical location or time of post-graft sampling. Inversely, *pif* gene (*pif-177*, *pif* and  
198 *BMPS-like*) expression was not consistent with previous studies and suggests that *pif*  
199 expression variation is strongly time-dependent, which could be the basis of the  
200 complex role of the *pif*-related gene family in pearl biomineralization.

201 **Different exon usage plays a role in shaping pearl quality.** Genes and related  
202 proteins involved in biomineralization have complex structures and often require post-  
203 translational modifications and proteolytic cleavages [50]. Alternative splicing in  
204 biomineralization-related genes has already been suggested by the presence of  
205 numerous isoforms for spicule matrix protein (SpSMs) coding gene in sea urchin [51]. In  
206 the present study, four biomineralization-related genes, *pif*, *aspein*, *perlwapin* and *wfd18*,  
207 were found to have significant differences in exon usage, and were all also differentially  
208 expressed between low and high pearl quality. The present study could not, however,  
209 assess whether the control of exon usage is under epigenetic and/or genetic control. In

210 an effort to reduce the variability inherent to the complex determination of pearl quality,  
211 our sampling design only included pooled samples from a single geographic location and  
212 mixed several pearl defect types. However, broadening our results on splicing events to  
213 the individual level and specific defect types could enable us to redefine the link  
214 between biomineralization gene architecture and pearl quality traits.

215 **Transposable elements might be involved in the regulation of cultured pearl**  
216 **quality.** Strikingly, this study only identified a few genes as being up-regulated in high  
217 quality pearls (n = 16) compared to the number of up-regulated genes in low quality  
218 pearls (n = 246). Among these up-regulated genes, there was a surprisingly high  
219 representation of transposable element- (TE) related genes (n = 3 out of 7 annotated  
220 genes) including long-transposable elements (LTR) of the Gypsy and Jockey families.  
221 Recent studies in humans and plants suggest that TEs and TEs insertion are effective  
222 regulators of gene expression and alternative splicing events [52–54]. Furthermore, it  
223 has been shown that both tandem repeats (TRs) and TEs are intimately linked with TRs  
224 derived from younger/more active TEs [55]. As an example, a study in maize supports  
225 the results of specific centromeric TRs originating from Ty3/gypsy retrotransposons  
226 [56]. From an evolutionary perspective, genes involved in biomineralization are  
227 structurally complex and often characterized by the presence of numerous TRs [57]. It is  
228 thus plausible that control of tandem repeat formations might result from TE insertion  
229 [44, 45]. However, by which mechanisms TEs (specifically Gypsy and Jockey family TEs)  
230 are involved in pearl quality remains to be elucidated. Further studies correlating TE  
231 insertion with the structure of transcripts (such as *aspein*), considering the specific  
232 genotypic background, should provide useful information that will help unravel the  
233 complex regulation of cultured pearl quality traits.

## 234 **Conclusions**

235 This study successfully made it possible to: 1) identify genes whose expression in pearl  
236 sacs was associated with cultured pearl quality in *P. margaritifera*, and 2) highlight other  
237 putative regulation levels for pearl quality determination through alternative splicing  
238 and TE regulation. Among the genes differentially expressed, new candidates were  
239 identified for pearl quality (*perlwapin*, *BMSP-like*), as were previously described  
240 biomarkers (*aspein* and *shematrixin-9*). The present study also showed, however, that  
241 gene expression of some biomarkers previously associated with pearl quality or  
242 thickness (*pif-177*, *pif*, *msi30*, *pearlin* or *nacrein*), is not systematically correlated with  
243 pearl quality, suggesting that other factors might be involved. Further studies should  
244 focus on time-course experiments from the first stages of mineral deposition until  
245 harvest so as to unravel gene expression in the successive biomineralization events and  
246 the interplay between environmental and genetic factors in controlling specific quality  
247 traits.

## 248 **Methods**

249 **Transcriptome reference assembly of *P. margaritifera*.** The multi-tissue reference  
250 transcriptome was built with tissues obtained from a total of 10 *P. margaritifera*  
251 individuals: gonad tissues (n = 2, obtained from one male and one female; [36]), whole  
252 tissue of 4-month-old juveniles (whole individuals, n = 2) and mantle tissue (n = 6; Table  
253 1). For all samples apart from the gonads, total RNA was extracted with TRIZOL Reagent  
254 (Life Technologies) at a ratio of 1 ml per 100 mg tissue, following manufacturer's  
255 recommendations. RNA quantity/integrity and purity were validated on a Nanodrop  
256 (NadoDrop Technologies Inc.) and on a BioAnalyzer 2100 (Agilent Technologies),  
257 respectively. RNA was dried in RNA-stable solution (ThermoFisher Scientific) following

258 manufacturer's recommendations and shipped at room temperature to McGill  
259 sequencing platform services (Montreal, Canada). TruSeq Sample Prep. (Illumina, San  
260 Diego, Ca, USA) RNA libraries were multiplexed (n = 10 pools by lane) and sequenced by  
261 HiSeq4000 100-bp paired-end (PE) sequencing technology. For the gonads, the samples  
262 were also sequenced by HiSeq2000 100-bp PE and were downloaded from the SRA  
263 database (Bioproject PRJNA229186; see [36] for more information on RNA preparation).  
264 Reads were filtered for adapter removal, minimum length ( $\geq 40$ -bp) and minimum  
265 quality (Q = 28) using Trimmomatic v0.36 [58]. The retained PE reads were assembled  
266 with Trinity v2.4.0 [59] using default parameters with a minimum transcript length of  
267 200-bp. Read quality was assessed before and after read trimming with FastQC v0.11.5  
268 (<https://www.bioinformatics.babraham.ac.uk/projects/fastqc/>).

269 Functional and mapping-rate filtering approaches were combined to reduce the  
270 redundancy present in the first version of the *P. margaritifera* transcriptome. Briefly,  
271 open-reading frames (ORFs) for each transcript were predicted using 'LongOrfs' function  
272 implemented in Transdecoder v3.0.1 [59]. Only the transcripts containing an ORF of at  
273 least 100 amino acids were kept. Another filtering step included the removal of isoforms  
274 with residual expression; hence, only the most expressed isoforms for each gene with a  
275 mean mapping rate of 0.5 transcripts per million (TPM) were kept. We used a blastN  
276 approach against curated and non-redundant viral, bacterial, archeal, plasmid and  
277 fungal RefSeq transcripts databases (Download 19-09-17;  
278 <ftp://ftp.ncbi.nlm.nih.gov/refseq/release/>) to remove putative contamination.  
279 Transcripts matching a reference with an e-value  $< 10^{-10}$ , minimum identity of 75% and  
280 minimum query coverage of 70% were discarded. Finally, Illumina adapters were  
281 screened in the transcriptome using a blastN approach and adapter list  
282 ([http://omicsoft.com/downloads/ngs/contamination\\_list/v1.txt](http://omicsoft.com/downloads/ngs/contamination_list/v1.txt)). Assessment of the

283 final transcriptome completeness was conducted with BUSCO v1.1b [60] against the  
284 conserved single-copy metazoan genes database (n = 978). Each filtering step was  
285 validated with TransRate v1.0.3 [61]. Filtered reads were then mapped back on the  
286 filtered reference transcriptome to evaluate individual mapping rate with GSNAP v2017-  
287 03-17 [62].

288 For functional annotation, the transcripts were searched against Uniprot-  
289 Swissprot [63], *Pinctada* *fucata*  
290 ([http://marinegenomics.oist.jp/pearl/viewer/download?project\\_id=20](http://marinegenomics.oist.jp/pearl/viewer/download?project_id=20)) and  
291 *Crassostrea gigas* (ftp://ftp.ncbi.nih.gov/genomes/Crassostrea\_gigas/RNA) protein  
292 databases using a blastX approach (e-value < 10<sup>-4</sup>) [64]. The best hit results are reported  
293 in Table 2.

294 **Animal and tissue sampling.** An experimental graft was realised in order to obtain  
295 cultured pearls and their corresponding pearl sacs. For this, a total of 20 pearl oyster  
296 donors were used to perform 600 grafts (30 grafts per donor) over a 2-day period, using  
297 2.4 BU nuclei (7.304 mm diameter, 0.59 g weight - Nucleus Bio, Hyakusyo Co., Japan) in  
298 December 2015. All grafts were performed under standard production conditions by a  
299 single expert at the Pahai Poe Pearl Farm (Apataki atoll, 15°34'S , 146°24' W, Tuamotu  
300 archipelago, French Polynesia) so as to minimize the grafter effect on pearl quality traits  
301 described in [65]. *Pinctada margaritifera* used in this part of the study had been  
302 collected as wild spat in December 2013 using commercial collectors in the lagoon of  
303 Takapoto atoll (14°32' S, 145°14' W, Tuamotu archipelago, French Polynesia), two years  
304 before the experimental graft took place.

305 At the time of pearl harvest (18 months after the grafting operation, May 2017)  
306 and in order to minimize the contamination by recipient tissues, the gonad was first cut

307 from the recipient oysters. The gonad tissue was then removed with a surgical blade  
308 until only a thin (< 0.5 mm) layer of tissue surrounding the pearl remained. At this point,  
309 only the pearl sac and the pearl remained [8]. Next, an incision was made in the pearl sac  
310 in such a way as to remove the pearl, which was then placed in a numbered box for  
311 traceability. The pearl sac was kept in a 2.0 ml tube with RNAlater until RNA extraction.  
312 A total of 442 pearl sacs were sampled (73.6% of the total number of oysters grafted).  
313 This pearl harvest rate represents the production yield, as nucleus rejection and  
314 mortality were observed over the entire culture time [66].

315 Cultured pearl grade was evaluated as described in [67]. The pearls were cleaned  
316 by ultrasonication in soapy water (hand washing) with a LEO 801 laboratory cleaner (2  
317 L capacity, 80 W, 46 kHz); they were then rinsed in distilled water. To ensure  
318 homogeneity in parameter assessment, all evaluations were made visually (no  
319 magnification devices were used) by the same professional operator. Cultured pearl  
320 grade is made up of two components: surface defects and lustre. When pearls are  
321 graded, the appearance of their surface is evaluated. The degree of imperfection is  
322 correlated with the number of defects (i.e. smooth surface vs. one or more spots). For the  
323 grade classification, high pearl quality corresponds to grades of C and above, and low  
324 quality to D1 and D2 grades (Figure 1). From the high and low quality pearls, twenty  
325 pearl sacs from each group that had produced only green pearls were randomly  
326 selected. Overall, high quality pearls were significantly heavier, with a thicker nacre  
327 layer than the low quality pearls (t-test;  $p$ -value < 0.05). Our sampling included 10  
328 donors equally allocated between several pools (either low or high pearl quality, as  
329 illustrated in Figure 1) with the objectives of reducing putative donor effect [68–71].

330 **RNA extraction and sequencing.** The total RNA extraction procedure was identical to  
331 that for the samples used in the transcriptome assembly. For each condition (low or high  
332 pearl quality), an equimolar RNA quantity was pooled (n = 5 individuals/pool) to give a  
333 total of five pools by condition. RNA was dried in RNA-stable solution (ThermoFisher  
334 Scientific) following manufacturer's recommendations and shipped at room  
335 temperature to McGill sequencing platform services (Montreal, Canada). TruSeq Sample  
336 Prep. (Illumina, San Diego, Ca, USA) RNA libraries were multiplexed (N=10 pools by  
337 lane) and sequenced by HiSeq 4000 100-bp paired-end (PE) sequencing technology.

338 **Differential expression analysis.** Raw reads were trimmed using Trimmomatic v0.36  
339 [58], using similar parameters as for the transcriptome assembly. Only paired-end reads  
340 were retained and mapped to the reference transcriptome, using GSNAP v2017-03-17  
341 [62] with default parameters but allowing a minimum mismatch value of 5. Low  
342 mapping quality, multi-mapping (-q 5) and "non-properly paired reads" (-f 0x2) were  
343 removed using Samtools v1.4.1 [72]. A matrix of raw counts was built using HTSeq-  
344 count [73]. Low coverage transcripts (CPM < 1 in at least 10 individuals) were removed,  
345 resulting in a total of 40,633 transcripts and differential expression was assessed using  
346 the DESeq2 R package [74]. Transcripts were considered significant when FDR < 0.01  
347 and  $|\log_{2}FC| \geq 1$ . Gene ontology (GO) enrichment was tested using GOAtools v0.6.5 [75]  
348 and the go-basic.obo database (release 2017-04-14) using Fisher's test. Our background  
349 list included the ensemble of genes used for differential expression after filtering for low  
350 coverage (n = 40,633 transcripts). Only GO terms with  $p$ -value < 0.05 and including at  
351 least three differentially expressed genes were considered. Significant GO enriched  
352 terms were used for semantic-based clustering in REVIGO (<http://revigo.irb.hr/>).

353 **Individual gene expression validation.** RT-qPCR was used to validate the expression  
354 patterns in the pearl sac, observed in RNA-seq, for key genes commonly used as markers

355 of pearl quality traits, namely *pif-177*, *aspein*, *shematin-9* and the *mantle protein 10*  
356 (MP10). For each pool, total RNA was treated with DNase I using a DNA-free Kit  
357 (Ambion). First, strand cDNA was synthesized from 500 ng total RNA using the  
358 Transcriptor First Strand cDNA Synthesis Kit (Roche) and a mix of poly (dT) and random  
359 hexamer primers. Real-Time PCR amplifications were carried out on a Roche Light  
360 Cycler 480. The amplification reaction contained 5  $\mu$ L LC 480 SYBR Green I Mast  
361 (Roche), 4  $\mu$ L cDNA templates, and 1  $\mu$ L of primer (1 $\mu$ M), in a final volume of 10  $\mu$ L. Each  
362 run included a positive cDNA and a blank control for each primer pair. The run protocol  
363 was as follows: initial denaturation at 95°C for 10 min followed by 40 cycles of  
364 denaturation at 95°C for 30 s, annealing at 60°C for 30 s and extension at 72°C for 60 s.  
365 Lastly, the amplicon melting temperature curve was analysed using a melting curve  
366 program: 45–95°C with a heating rate of 0.1°C s<sup>-1</sup> and continuous fluorescence  
367 measurement.

368 All measurements were made in duplicate and all analyses were based on the Ct  
369 values of the PCR products. Relative gene expression levels were calculated using the  
370 delta–delta method, normalized with two reference genes (*elongation-factor 1* and  
371 *glyceraldehyde-3-phosphate dehydrogenase*), to compare the relative expression results  
372 as follows: Relative expression (target gene, sample x) =  $2^{-(\Delta Ct_{\text{sample x}} - \Delta Ct_{\text{calibrator, sample x}})} = 2^{-\Delta \Delta Ct}$   
373 [76]. Here, the  $\Delta Ct$  calibrator represents the mean of the  $\Delta Ct$  values obtained for the  
374 tested gene. The delta threshold cycle ( $\Delta Ct$ ) is calculated as the difference in Ct for the  
375 target and reference genes. The relative stability of the GAPDH and EF-1 combination  
376 was confirmed using NormFinder [77]. PCR efficiency (E) was estimated for each primer  
377 pair by determining the slopes of standard curves obtained from serial dilution analysis  
378 of a cDNA to ensure that E ranged from 90 to 110%. The primers used for amplification  
379 are listed in Table S2. Wilcoxon non-parametric tests were used to compare relative



380 expression between conditions, differences were considered significant when p-value <  
381 0.01. This complete list of primers is given in the supplementary file (Table S3).

382 **Alternative gene splicing and exon usage.** To detect putative differential splicing  
383 variants, the reads were mapped on the scaffolds of the assembled draft genome,  
384 available for *P. margaritifera*. To reduce non-biological redundancy inherent to the  
385 current assembly state of the genome, only scaffolds with length >3,000 bp were used  
386 for the mapping. From the 757,552 scaffolds initial set, only the 32,705 longest scaffolds  
387 were retained for downstream analysis, on which 37,662 (92.7%) of the transcripts in  
388 our set could be positioned using the GMAP v2017-03-17 aligner with the default  
389 parameters for annotation [78]. Reads were mapped on the filtered reference genome  
390 using GSNAP v2017-03-17 aligner allowing five mismatches, splicing and using the  
391 '*splitting-output*' function to retain only concordant and unique mapped paired-end  
392 reads [78]. We used the QORTs [79] and JunctionSeq R packages [80] to detect  
393 significant differences in exon usage. Only exons and junctions with a minimal coverage  
394 of six were used for the analysis and only differences with FDR < 0.01 were considered  
395 significant.

## 396 **List of abbreviations**

397 BMSP-like: Blue mussel shell protein-like

398 Pwap: Perlwapin

399 wfd18: Wap four-disulfide core domain protein

## 400 **Declarations**

401 **Availability of data and material.** Raw transcriptome sequences data have been  
402 deposited at NCBI (Bioproject: PRJNA449941). Genome and transcriptome assemblies

403 will be made publically available upon acceptance of the manuscript. Codes for RNA-seq  
404 analysis are available upon request.

405 **Competing interests.** Authors declare no competing interest

406 **Funding.** This study was supported by grants from the “Direction des Ressources  
407 Marines et Minières”, through the AmeliGEN project (# 10065/MEI/DRMM).

408 **Authors' contributions.** CLK conceived the study. NL, VQ conducted the pearl sac  
409 sampling and the RT-qPCR analysis, respectively. PA and JLL assembled the  
410 transcriptome. CR and JVD assembled the reference genome of *P. margaritifera*. JLL  
411 analysed the RNAseq data. JLL and CLK wrote the paper. All co-authors contributed to  
412 reviewing the manuscript and accepted the final version for publication.

413 **Acknowledgements.** The authors would especially like thank the host site, Pahai Poe  
414 Pearl Farm located in Apataki atoll (Tuamotu archipelago, French Polynesia) for their  
415 generous support, and D. Potin for his assistance with the cultured pearl photographs.  
416 The authors thank the Ifremer (Datarmor; RIC) and Station Biologique de Roscoff  
417 (ABiMS; <http://abims.sb-roscoff.fr>) bioinformatic platforms for providing computational  
418 resources and analysis support.

## 419 **Figures and tables**

420 Figure 1: High and low quality cultured pearl samples from *P. margaritifera*. Each row  
421 within each condition (high or low quality), represents a specific pool (n = 4 cultured  
422 pearls / pool / condition). Numbers represent pools by condition (high or low pearl  
423 quality).

424 Figure 2: Genes differentially expressed between *P. margaritifera* pearl sacs having  
425 produced high and low quality pearls: A) Principal component analysis (PCA); B)  
426 Heatmap of differentially expressed genes. LogCPM (+2) were computed based on raw  
427 counts normalized for library size reported to the mean gene expression over all  
428 individuals; and C) Table showing the number of differentially expressed genes.

429 Figure 3: Bar plots of mean expression of biomineralization-related genes in pearl sac of  
430 *P. margaritifera*. Only genes with significant differential expression (FDR < 0.01 and  
431  $|\log_2FC| > 1$ ) are reported for clarity. Values are expressed as the mean (logCPM + 2) per  
432 condition  $\pm$  standard deviation. Orange = high pearl quality; Blue = low pearl quality.  
433 Asterisks indicate genes for which multiple isoforms were reported in the transcriptome  
434 assembly. For each of these genes at least one of the isoforms was differentially  
435 expressed.

436 Figure 4: Splicing event visualization for the aspein gene in the pearl sac of *P.*  
437 *margaritifera*. Normalized counts are plotted for each gene section, either exon (E) or  
438 junction (J), and each individual; blue = high quality and orange = low quality. Values in  
439 the box plot represent p-values (Fisher's test) for each gene section.

440 Table 1: Transcriptome assembly, annotation statistics and differential expression  
441 results

## 442 **Supplementary**

443 Figure S1: Summarized REVIGO semantic plot for gene ontology enrichment analysis

444 Figure S2: Relative gene expression for biomineralization genes analysed by qPCR in the  
445 pearl sac of *P. margaritifera*. Values are expressed as means of relative expression  $\pm$   
446 standard deviation. Asterisks indicate significant differences (Wilcoxon test,  $p$ -value <  
447 0.01).

448 Table S1: *P. margaritifera* individuals used for the transcriptome assembly. NA = Not  
449 identified.

450 Table S 2: Complete list and statistics on differentially expressed genes and their  
451 annotation.

452 Table S 3: Set of forward and reverse primers used for the biomineralization gene expression  
453 (real-time PCR) analysis in *Pinctada margaritifera*.

454

455

## 456 **References**

- 457 1. Taylor JJ, Strack E. Pearl production. In: Southgate PC, Lucas JS, editors. Pearl oyster.  
458 Amsterdam, The Netherlands: Elsevier. p. 273–302.
- 459 2. Gervis MH, Sims NA. The biology and culture of pearl oysters (*Bivalvia pteriidae*).  
460 London, England : Manila, Philippines: Overseas Development Administration of the  
461 United Kingdom ; International Center for Living Aquatic Resources Management; 1992.
- 462 3. Kishore P, Southgate PC. A detailed description of pearl-sac development in the  
463 black-lip pearl oyster, *Pinctada margaritifera* (Linnaeus 1758). Aquac Res.  
464 2016;47:2215–26. <https://onlinelibrary.wiley.com/doi/epdf/10.1111/are.12674>.  
465 Accessed 27 Jun 2018.
- 466 4. Ky C-L, Blay C, Sham-Koua M, Vanaa V, Lo C, Cabral P. Family effect on cultured pearl  
467 quality in black-lipped pearl oyster *Pinctada margaritifera* and insights for genetic  
468 improvement. Aquat Living Resour. 2013;26:133–45. doi:10.1051/alr/2013055.
- 469 5. Ellis S, Haws M. Producing pearls using the black-lip pearl oyster (*Pinctada*  
470 *margaritifera*). Aquafarmer Inf. Sheet. 1999;:8.
- 471 6. Blay C, Planes S, Ky C-L. Crossing phenotype heritability and candidate gene  
472 expression in grafted black-lipped pearl oyster *Pinctada margaritifera*, an animal  
473 chimera. J Heridity. 2018;in press.
- 474 7. Ky C-L, Okura R, Nakasai S, Devaux D. Quality trait signature at archipelago scale of the  
475 cultured pearls produced by the black-lipped pearl oyster (*Pinctada margaritifera* Var.  
476 *cumingi*) in French Polynesia. J Shellfish Res. 2016;35:827–35.
- 477 8. Latchere O, Le Moullac G, Gaertner-Mazouni N, Fievet J, Magré K, Saulnier D. Influence

- 478 of preoperative food and temperature conditions on pearl biogenesis in *Pinctada*  
479 *margaritifera*. *Aquaculture*. 2017;479 Supplement C:176–87.  
480 doi:10.1016/j.aquaculture.2017.05.046.
- 481 9. Li S, Huang J, Liu C, Liu Y, Zheng G, Xie L, et al. Interactive effects of seawater  
482 acidification and elevated temperature on the transcriptome and biomineralization in  
483 the pearl oyster *Pinctada fucata*. *Environ Sci Technol*. 2016;50:1157–65.  
484 doi:10.1021/acs.est.5b05107.
- 485 10. Gueguen Y, Czorlich Y, Mastail M, Le Tohic B, Defay D, Lyonnard P, et al. Yes, it turns:  
486 experimental evidence of pearl rotation during its formation. *R Soc Open Sci*.  
487 2015;2:150144. doi:10.1098/rsos.150144.
- 488 11. Tayalé A, Gueguen Y, Treguier C, Grand JL, Cochenec-Laureau N, Montagnani C, et al.  
489 Evidence of donor effect on cultured pearl quality from a duplicated grafting experiment  
490 on *Pinctada margaritifera* using wild donors. *Aquat Living Resour*. 2012;25:269–80.  
491 doi:10.1051/alr/2012034.
- 492 12. Ky C-L, Blay C, Sham-Koua M, Lo C, Cabral P. Indirect improvement of pearl grade  
493 and shape in farmed *Pinctada margaritifera* by donor “oyster” selection for green pearls.  
494 *Aquaculture*. 2014;432 Supplement C:154–62. doi:10.1016/j.aquaculture.2014.05.002.
- 495 13. Blay C, Sham-Koua M, Vonau V, Tetumu R, Cabral P, Ky C-L. Influence of nacre  
496 deposition rate on cultured pearl grade and colour in the black-lipped pearl oyster  
497 *Pinctada margaritifera* using farmed donor families. *Aquac Int*. 2014;22:937–53.  
498 doi:10.1007/s10499-013-9719-5.
- 499 14. Ky C-L, Blay C, Aiho V, Cabral P, Le Moullac G, Lo C. Macro-geographical differences  
500 influenced by family-based expression on cultured pearl grade, shape and colour in the

- 501 black-lip 'pearl oyster' *Pinctada margaritifera*: a preliminary bi-local case study in  
502 French Polynesia. *Aquac Res.* 2017;48:270–82. doi:10.1111/are.12880.
- 503 15. Blay C, Planes S, Ky C-L. Optimal age of the donor graft tissue in relation to cultured  
504 pearl phenotypes in the mollusc, *Pinctada margaritifera*. *PLOS ONE.* 2018;13:e0198505.  
505 doi:10.1371/journal.pone.0198505.
- 506 16. Ky C-L, Nakasai S, Parrad S, Broustal F, Devaux D, Louis P. Variation in cultured pearl  
507 quality traits in relation to position of saibo cutting on the mantle of black-lipped pearl  
508 oyster *Pinctada margaritifera*. *Aquaculture.* 2018;493:85–92.  
509 doi:10.1016/j.aquaculture.2018.04.059.
- 510 17. Ky C-L, Molinari N, Moe E, Pommier S. Impact of season and grafter skill on nucleus  
511 retention and pearl oyster mortality rate in *Pinctada margaritifera* aquaculture. *Aquac*  
512 *Int.* 2014;22:1689–701. doi:10.1007/s10499-014-9774-6.
- 513 18. Lemer S, Saulnier D, Gueguen Y, Planes S. Identification of genes associated with shell  
514 color in the black-lipped pearl oyster, *Pinctada margaritifera*. *BMC Genomics.* 2015;16.
- 515 19. Jones DB, Jerry DR, Khatkar MS, Raadsma HW, Zenger KR. A high-density SNP genetic  
516 linkage map for the silver-lipped pearl oyster, *Pinctada maxima*: a valuable resource for  
517 gene localisation and marker-assisted selection. *BMC Genomics.* 2013;14:810.  
518 doi:10.1186/1471-2164-14-810.
- 519 20. Jones DB, Jerry DR, Khatkar MS, Moser G, Raadsma HW, Taylor JJ, et al. Quantitative  
520 trait loci and genetic association analysis reveals insights into complex pearl quality  
521 traits in donor silver-lipped pearl oysters. *Aquaculture.* 2014;434:476–85.  
522 doi:10.1016/j.aquaculture.2014.08.038.

- 523 21. Inoue N, Ishibashi R, Ishikawa T, Atsumi T, Aoki H, Komaru A. Comparison of  
524 expression patterns of shell matrix protein genes in the mantle tissues between high-  
525 and low-quality pearl-producing recipients of the pearl oyster, *Pinctada fucata*. *Zoolog*  
526 *Sci.* 2011;28:32–6. doi:10.2108/zsj.28.32.
- 527 22. Inoue N, Ishibashi R, Ishikawa T, Atsumi T, Aoki H, Komaru A. Can the quality of  
528 pearls from the Japanese pearl oyster (*Pinctada fucata*) be explained by the gene  
529 expression patterns of the major shell matrix proteins in the pearl sac? *Mar Biotechnol N*  
530 *Y N.* 2011;13:48–55. doi:10.1007/s10126-010-9267-1.
- 531 23. Blay C, Planes S, Ky C-L. Cultured pearl surface quality profiling by the shell matrix  
532 protein gene expression in the biomineralised pearl sac tissue of *Pinctada margaritifera*.  
533 *Mar Biotechnol.* 2018;in press in press.
- 534 24. Marie B, Joubert C, Tayalé A, Zanella-Cléon I, Belliard C, Piquemal D, et al. Different  
535 secretory repertoires control the biomineralization processes of prism and nacre  
536 deposition of the pearl oyster shell. *Proc Natl Acad Sci.* 2012;109:20986–91.  
537 doi:10.1073/pnas.1210552109.
- 538 25. Marie B, Jackson DJ, Ramos-Silva P, Zanella-Cléon I, Guichard N, Marin F. The shell-  
539 forming proteome of *Lottia gigantea* reveals both deep conservations and lineage-  
540 specific novelties. *FEBS J.* 280:214–32. doi:10.1111/febs.12062.
- 541 26. Isowa Y, Sarashina I, Setiamarga DHE, Endo K. A comparative study of the shell  
542 matrix protein aspein in pteroid bivalves. *J Mol Evol.* 2012;75:11–8.  
543 doi:10.1007/s00239-012-9514-3.
- 544 27. Takeuchi T, Sarashina I, Iijima M, Endo K. *In vitro* regulation of CaCO<sub>3</sub> crystal  
545 polymorphism by the highly acidic molluscan shell protein Aspein. *FEBS Lett.*

- 546 2008;582:591–6. doi:10.1016/j.febslet.2008.01.026.
- 547 28. Tsukamoto D, Sarashina I, Endo K. Structure and expression of an unusually acidic  
548 matrix protein of pearl oyster shells. *Biochem Biophys Res Commun.* 2004;320:1175–  
549 80. doi:10.1016/j.bbrc.2004.06.072.
- 550 29. Elhadj S, Yoreo JJD, Hoyer JR, Dove PM. Role of molecular charge and hydrophilicity  
551 in regulating the kinetics of crystal growth. *Proc Natl Acad Sci.* 2006;103:19237–42.  
552 doi:10.1073/pnas.0605748103.
- 553 30. Shi Y, He M. Differential gene expression identified by RNA-Seq and qPCR in two  
554 sizes of pearl oyster (*Pinctada fucata*). *Gene.* 2014;538:313–22.  
555 doi:10.1016/j.gene.2014.01.031.
- 556 31. Li S, Liu C, Huang J, Liu Y, Zhang S, Zheng G, et al. Transcriptome and  
557 biomineralization responses of the pearl oyster *Pinctada fucata* to elevated CO<sub>2</sub> and  
558 temperature. *Sci Rep.* 2016;6:18943. doi:10.1038/srep18943.
- 559 32. Zhao X, Wang Q, Jiao Y, Huang R, Deng Y, Wang H, et al. Identification of genes  
560 potentially related to biomineralization and Immunity by transcriptome analysis of  
561 pearl sac in pearl oyster *Pinctada martensii*. *Mar Biotechnol.* 2012;14:730–9.  
562 doi:10.1007/s10126-012-9438-3.
- 563 33. Shi Y, Yu C, Gu Z, Zhan X, Wang Y, Wang A. Characterization of the pearl oyster  
564 (*Pinctada martensii*) mantle transcriptome unravels biomineralization genes. *Mar*  
565 *Biotechnol.* 2013;15:175–87. doi:10.1007/s10126-012-9476-x.
- 566 34. Li H, Liu B, Huang G, Fan S, Zhang B, Su J, et al. Characterization of transcriptome and  
567 identification of biomineralization genes in winged pearl oyster (*Pteria penguin*) mantle



- 568 tissue. *Comp Biochem Physiol Part D Genomics Proteomics*. 2017;21:67–76.  
569 doi:10.1016/j.cbd.2016.12.002.
- 570 35. Joubert C, Piquemal D, Marie B, Manchon L, Pierrat F, Zanella-Cléon I, et al.  
571 Transcriptome and proteome analysis of *Pinctada margaritifera* calcifying mantle and  
572 shell: focus on biomineralization. *BMC Genomics*. 2010;11:613. doi:10.1186/1471-2164-  
573 11-613.
- 574 36. Teaniniuraitemoana V, Huvet A, Levy P, Klopp C, Lhuillier E, Gaertner-Mazouni N, et  
575 al. Gonad transcriptome analysis of pearl oyster *Pinctada margaritifera*: identification of  
576 potential sex differentiation and sex determining genes. *BMC Genomics*. 2014;15:491.  
577 doi:10.1186/1471-2164-15-491.
- 578 37. Huang X-D, Zhao M, Liu W-G, Guan Y-Y, Shi Y, Wang Q, et al. Gigabase-scale  
579 transcriptome analysis on four species of pearl oysters. *Mar Biotechnol*. 2013;15:253–  
580 64.
- 581 38. Marin F, Luquet G, Marie B, Medakovic D. Molluscan shell proteins: primary  
582 structure, origin, and evolution. *Curr Top Dev Biol*. 2008;80:209–76.  
583 doi:10.1016/S0070-2153(07)80006-8.
- 584 39. Marie B, Arivalagan J, Mathéron L, Bolbach G, Berland S, Marie A, et al. Deep  
585 conservation of bivalve nacre proteins highlighted by shell matrix proteomics of the  
586 Unionoida *Elliptio complanata* and *Villosa lienosa*. *J R Soc Interface*. 2017;14:20160846.  
587 doi:10.1098/rsif.2016.0846.
- 588 40. Kocot KM, Aguilera F, McDougall C, Jackson DJ, Degnan BM. Sea shell diversity and  
589 rapidly evolving secretomes: insights into the evolution of biomineralization. *Front Zool*.  
590 2016;13.

- 591 41. Bahn SY, Jo BH, Choi YS, Cha HJ. Control of nacre biomineralization by Pif80 in pearl  
592 oyster. *Sci Adv.* 2017;3.
- 593 42. Gu Z, Yin X, Yu C, Zhan X, Shi Y, Wang A. Expression profiles of nine biomineralization  
594 genes and their relationship with pearl nacre thickness in the pearl oyster, *Pinctada*  
595 *fucata martensii* Dunker. *Aquac Res.* 2016;47:1874–84. doi:10.1111/are.12645.
- 596 43. Arivalagan J, Yarra T, Marie B, Sleight VA, Duvernois-Berthet E, Clark MS, et al.  
597 Insights from the Shell Proteome: Biomineralization to Adaptation. *Mol Biol Evol.*  
598 2017;34:66–77. doi:10.1093/molbev/msw219.
- 599 44. Jackson DJ, McDougall C, Woodcroft B, Moase P, Rose RA, Kube M, et al. Parallel  
600 evolution of nacre building gene sets in molluscs. *Mol Biol Evol.* 2010;27:591–608.
- 601 45. Wang X, Liu Z, Wu W. Transcriptome analysis of the freshwater pearl mussel  
602 (*Cristaria plicata*) mantle unravels genes involved in the formation of shell and pearl.  
603 *Mol Genet Genomics MGG.* 2017;292:343–52.
- 604 46. Li S, Liu Y, Huang J, Zhan A, Xie L, Zhang R. The receptor genes PfbMPR1B and  
605 PfbBAMBI are involved in regulating shell biomineralization in the pearl oyster *Pinctada*  
606 *fucata*. *Sci Rep.* 2017;7.
- 607 47. Joubert C, Linard C, Moullac GL, Soyez C, Saulnier D, Teaniniuraitemoana V, et al.  
608 Temperature and food influence shell growth and mantle gene expression of shell  
609 matrix proteins in the pearl oyster *Pinctada margaritifera*. *PLOS ONE.* 2014;9:e103944.  
610 doi:10.1371/journal.pone.0103944.
- 611 48. Blay C, Parrad S, Cabral P, Aiho V, Ky C-L. Correlations between cultured pearl size  
612 parameters and PIF-177 biomarker expression in *Pinctada margaritifera* families reared

- 613 in two contrasting environments. *Estuar Coast Shelf Sci.* 2016;182 Part B:254–60.  
614 doi:10.1016/j.ecss.2016.05.020.
- 615 49. Feng D, Li Q, Yu H, Kong L, Du S. Identification of conserved proteins from diverse  
616 shell matrix proteome in *Crassostrea gigas*: characterization of genetic bases regulating  
617 shell formation. *Sci Rep.* 2017;7.
- 618 50. Suzuki M, Saruwatari K, Kogure T, Yamamoto Y, Nishimura T, Kato T, et al. An acidic  
619 matrix protein, Pif, is a key macromolecule for nacre formation. *Science.*  
620 2009;325:1388–1390. doi:10.1126/science.1173793.
- 621 51. Livingston BT, Killian CE, Wilt F, Cameron A, Landrum MJ, Ermolaeva O, et al. A  
622 genome-wide analysis of biomineralization-related proteins in the sea urchin  
623 *Strongylocentrotus purpuratus*. *Dev Biol.* 2006;300:335–48.  
624 doi:10.1016/j.ydbio.2006.07.047.
- 625 52. Chuong EB, Elde NC, Feschotte C. Regulatory activities of transposable elements:  
626 from conflicts to benefits. *Nat Rev Genet.* 2017;18:71–86. doi:10.1038/nrg.2016.139.
- 627 53. Hirsch CD, Springer NM. Transposable element influences on gene expression in  
628 plants. *Biochim Biophys Acta BBA - Gene Regul Mech.* 2017;1860:157–65.  
629 doi:10.1016/j.bbagr.2016.05.010.
- 630 54. Trizzino M, Park Y, Holsbach-Beltrame M, Aracena K, Mika K, Caliskan M, et al.  
631 Transposable elements are the primary source of novelty in primate gene regulation.  
632 *Genome Res.* 2017;:gr.218149.116. doi:10.1101/gr.218149.116.
- 633 55. Ahmed M, Liang P. Transposable elements are a significant contributor to tandem  
634 repeats in the Human genome. *Comparative and Functional Genomics.* 2012.

- 635 56. Sharma A, Wolfgruber TK, Presting GG. Tandem repeats derived from centromeric  
636 retrotransposons. *BMC Genomics*. 2013;14:142. doi:10.1186/1471-2164-14-142.
- 637 57. Liu J, Yang D, Liu S, Li S, Xu G, Zheng G, et al. Microarray: a global analysis of  
638 biomineralization-related gene expression profiles during larval development in the  
639 pearl oyster, *Pinctada fucata*. *BMC Genomics*. 2015;16. doi:10.1186/s12864-015-1524-  
640 2.
- 641 58. Bolger AM, Lohse M, Usadel B. Trimmomatic: a flexible trimmer for Illumina  
642 sequence data. *Bioinformatics*. 2014;:btu170.
- 643 59. Haas BJ, Papanicolaou A, Yassour M, Grabherr M, Blood PD, Bowden J, et al. De novo  
644 transcript sequence reconstruction from RNA-seq using the Trinity platform for  
645 reference generation and analysis. *Nat Protoc*. 2013;8:1494–1512.
- 646 60. Simão FA, Waterhouse RM, Ioannidis P, Kriventseva EV, Zdobnov EM. BUSCO:  
647 assessing genome assembly and annotation completeness with single-copy orthologs.  
648 *Bioinformatics*. 2015;31:3210–2.
- 649 61. Smith-Unna R, Bournnell C, Patro R, Hibberd JM, Kelly S. TransRate: reference-free  
650 quality assessment of de novo transcriptome assemblies. *Genome Res*. 2016;26:1134–  
651 44.
- 652 62. Wu TD, Reeder J, Lawrence M, Becker G, Brauer MJ. GMAP and GSNAP for genomic  
653 sequence alignment: enhancements to speed, accuracy, and functionality. *Statistical*  
654 *Genomics: Methods and Protocols*. 2016;:283–334.
- 655 63. Bairoch A, Apweiler R. The SWISS-PROT protein sequence database and its  
656 supplement TrEMBL in 2000. *Nucleic Acids Res*. 2000;28:45–8.

- 657 <http://www.ncbi.nlm.nih.gov/pmc/articles/PMC102476/>. Accessed 20 Dec 2016.
- 658 64. Altschul SF, Madden TL, Schäffer AA, Zhang J, Zhang Z, Miller W, et al. Gapped BLAST  
659 and PSI-BLAST: a new generation of protein database search programs. *Nucleic Acids*  
660 *Res.* 1997;25:3389–402.
- 661 65. Ky C-L, Lau C, Koua MS, Lo C. Growth performance comparison of *Pinctada*  
662 *margaritifera* juveniles produced by thermal dhock or gonad scarification spawning  
663 procedures. *J Shellfish Res.* 2015;34:811–7.
- 664 66. Ky C-L, Molinari N, Moe E, Pommier S. Impact of season and grafter skill on nucleus  
665 retention and pearl oyster mortality rate in *Pinctada margaritifera* aquaculture. *Aquac*  
666 *Int.* 2014;22:1689–701.
- 667 67. Ky C-L, Okura R, Nakasai S, Devaux D. Quality trait signature at archipelago scale of  
668 the cultured pearls produced by the black-lipped pearl oyster (*Pinctada margaritifera*  
669 *Var. cumingi*) in French Polynesia. *J Shellfish Res.* 2016;35:827–35.
- 670 68. McGinty EL, Zenger KR, Jones DB, Jerry DR. Transcriptome analysis of  
671 biomineralisation-related genes within the pearl sac: Host and donor oyster  
672 contribution. *Mar Genomics.* 2012;5:27–33.
- 673 69. Tayalé A, Gueguen Y, Treguier C, Grand JL, Cochenec-Laureau N, Montagnani C, et al.  
674 Evidence of donor effect on cultured pearl quality from a duplicated grafting experiment  
675 on *Pinctada margaritifera* using wild donors. *Aquat Living Resour.* 2012;25:269–80.
- 676 70. Ky C-L, Blay C, Sham-Koua M, Vanaa V, Lo C, Cabral P. Family effect on cultured pearl  
677 quality in black-lipped pearl oyster *Pinctada margaritifera* and insights for genetic  
678 improvement. *Aquat Living Resour.* 2013;26:133–45.

- 679 71. Ky C-L, Blay C, Sham-Koua M, Lo C, Cabral P. Indirect improvement of pearl grade  
680 and shape in farmed *Pinctada margaritifera* by donor “oyster” selection for green pearls.  
681 *Aquaculture*. 2014;432 Supplement C:154–62.
- 682 72. Li H, Handsaker B, Wysoker A, Fennell T, Ruan J, Homer N, et al. The Sequence  
683 Alignment/Map format and SAMtools. *Bioinformatics*. 2009;25:2078–9.
- 684 73. Anders S, Pyl PT, Huber W. HTSeq—a Python framework to work with high-  
685 throughput sequencing data. *Bioinformatics*. 2015;31:166–9.
- 686 74. Love MI, Huber W, Anders S. Moderated estimation of fold change and dispersion for  
687 RNA-seq data with DESeq2. *Genome Biol*. 2014;15:550.
- 688 75. Klopfenstein DV, Zhang L, Pedersen BS, Ramírez F, Warwick Vesztröcy A, Naldi A, et  
689 al. GOATOOLS: A Python library for Gene Ontology analyses. *Sci Rep*. 2018;8:10872.  
690 doi:10.1038/s41598-018-28948-z.
- 691 76. Livak KJ, Schmittgen TD. Analysis of relative gene expression data using real-time  
692 quantitative PCR and the 2(-Delta Delta C(T)) Method. *Methods San Diego Calif*.  
693 2001;25:402–8. doi:10.1006/meth.2001.1262.
- 694 77. Andersen CL, Jensen JL, Ørntoft TF. Normalization of real-time quantitative reverse  
695 transcription-PCR data: a model-based variance estimation approach to identify genes  
696 suited for normalization, applied to bladder and colon cancer data sets. *Cancer Res*.  
697 2004;64:5245–50.
- 698 78. Wu TD, Reeder J, Lawrence M, Becker G, Brauer MJ. GMAP and GSNAP for genomic  
699 sequence alignment: enhancements to speed, accuracy, and functionality. *Statistical*  
700 *Genomics: Methods and Protocols*. 2016;:283–334. [30](http://dx.doi.org/10.1007/978-1-</a></p></div><div data-bbox=)

701 4939-3578-9\_15.

702 79. Hartley SW, Mullikin JC. QoRTs: a comprehensive toolset for quality control and data  
703 processing of RNA-Seq experiments. BMC Bioinformatics. 2015;16.

704 80. Hartley SW, Mullikin JC. Detection and visualization of differential splicing in RNA-  
705 Seq data with JunctionSeq. Nucleic Acids Res. 2016;;gkw501.

706

707

708

709 Figure 1.

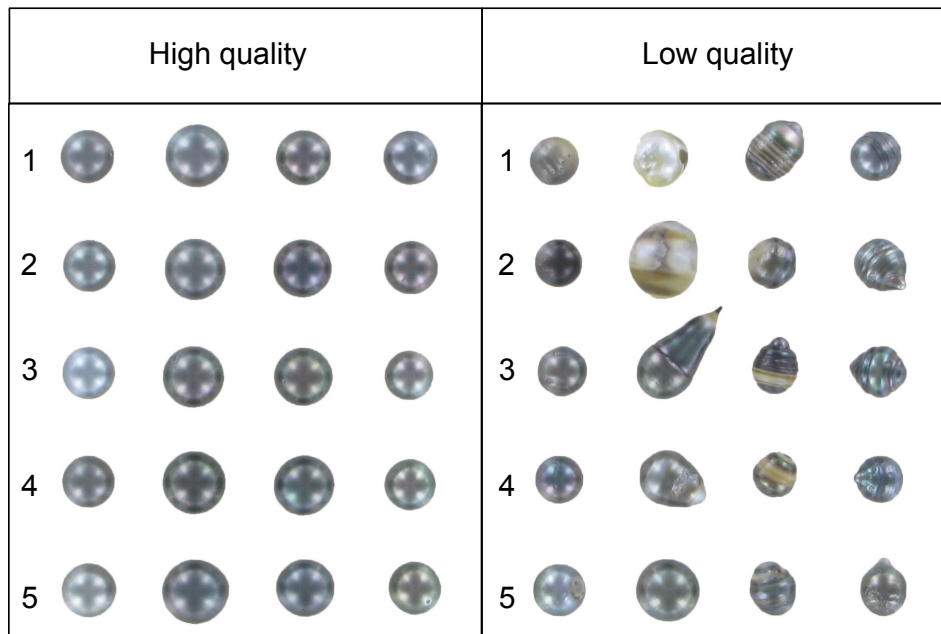

710

711



712

713 Figure 2.

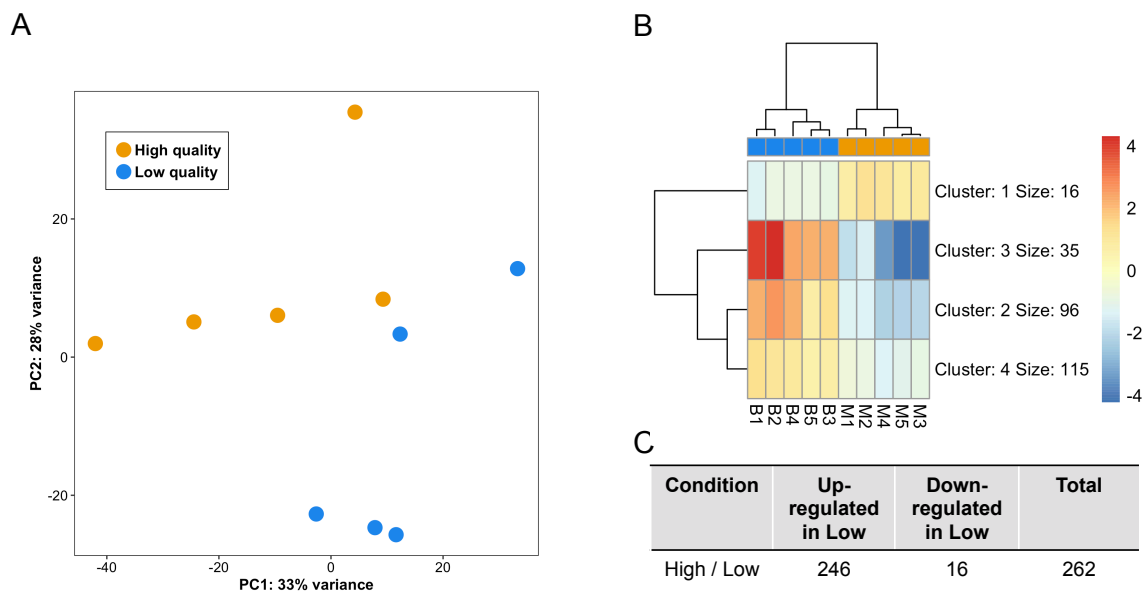

714

715

716

717 Figure 3.

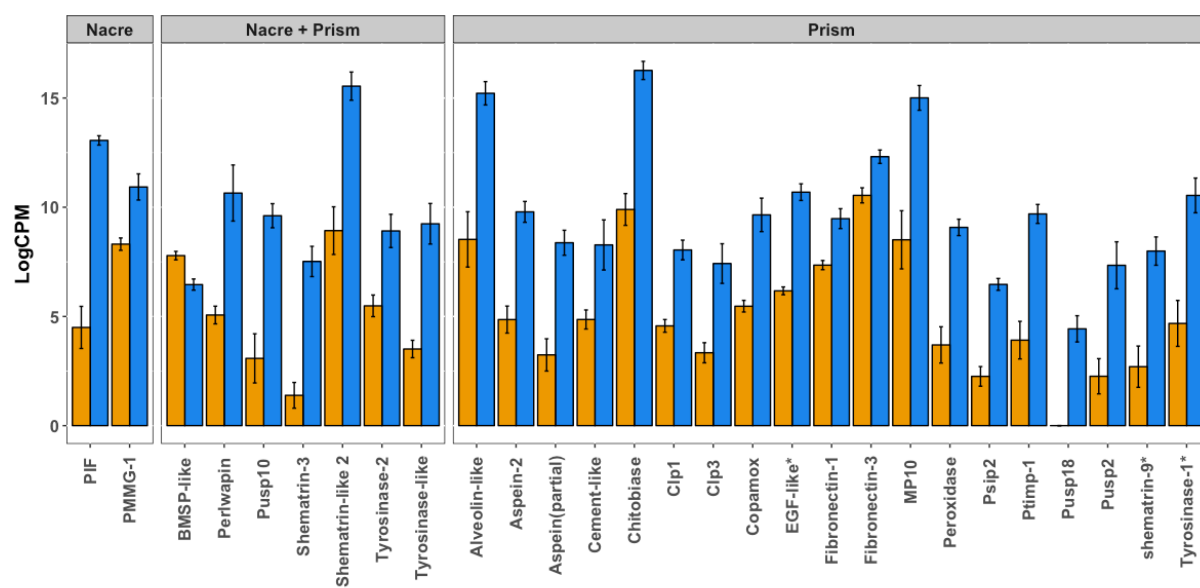

718

719

720

721 Figure 4.

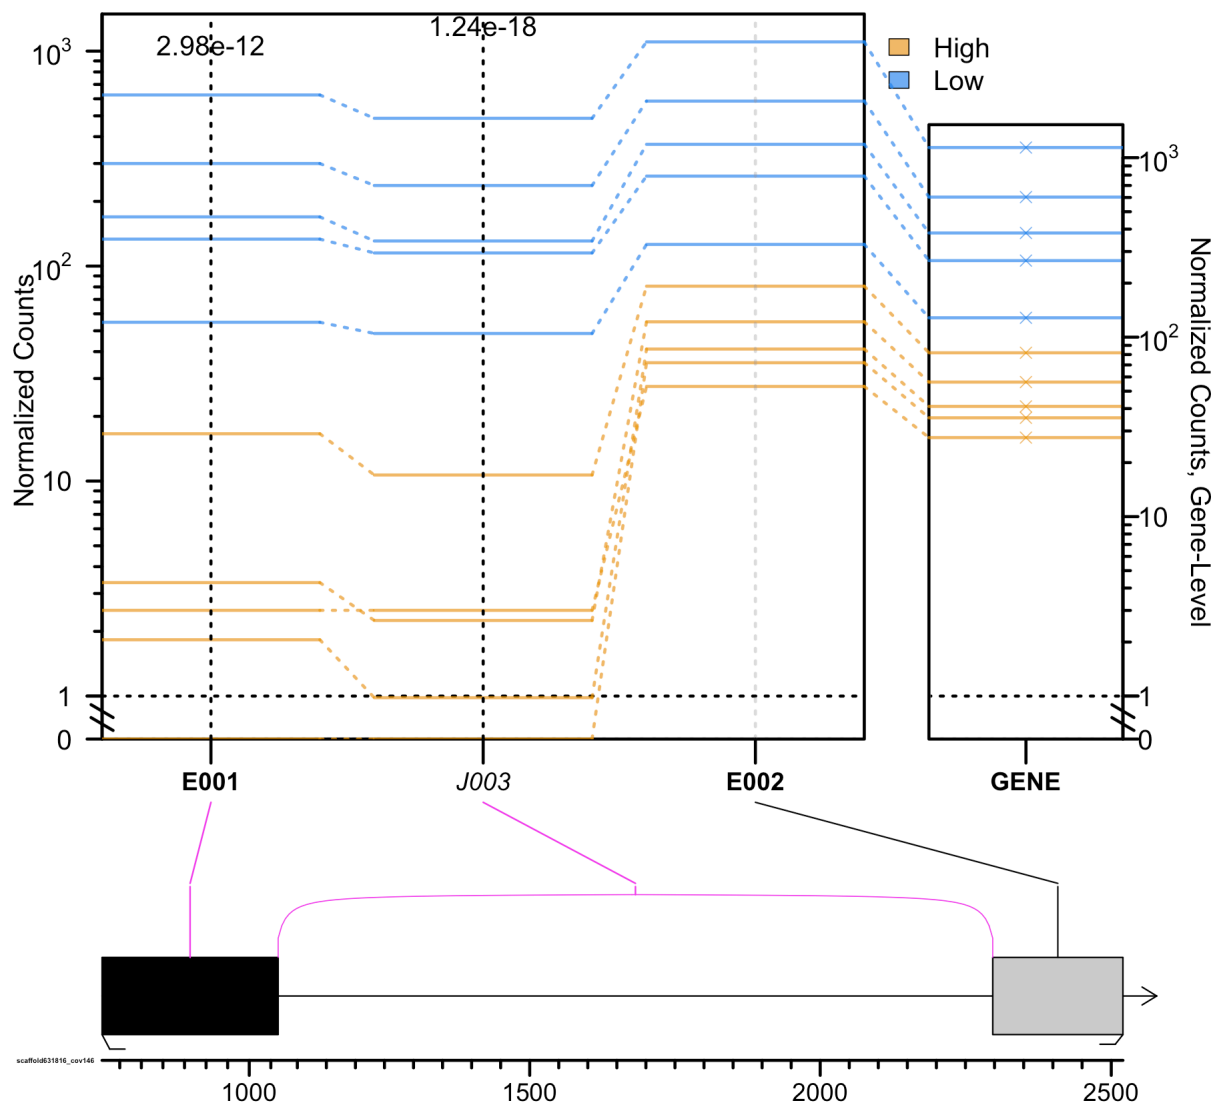

722

723

724

725 Table 1.

---

| <b>Transcriptome statistics</b> |            |
|---------------------------------|------------|
| Raw number of contigs           | 541,184    |
| Total number of contigs         | 41,075     |
| Percent GC                      | 39.1       |
| Contigs N50 (bp)                | 2,087      |
| Total assembled bases           | 57,671,860 |
| Median contig length (bp)       | 958        |
| Average contig length (bp)      | 1,404.06   |

---

| <b>Annotation</b>                                        |                     |
|----------------------------------------------------------|---------------------|
| Contig with <i>P. fucata</i> match (e-value $10^{-4}$ )  | 32,489<br>(19,850)* |
| Contig with <i>C. Gigas</i> match (e-value $10^{-4}$ )   | 27,568<br>(12,837)* |
| Contig with Uniprot-Swissprot match (e-value $10^{-4}$ ) | 20,177<br>(845)*    |
| Contig with GO identifier annotation**                   | 18,163              |

---

726 \* Best hit

727 \*\* Based on Uniprot-Swissprot blastX results

728
